# Supplementary material for: Identical extraction behavior and coordination of trivalent or hexavalent f-element cations using ionic liquid and molecular solvents
Source: Royal Society of Chemistry journal article supplement (doi:10.1039/b502016f), 2005-01-01
Supplement: b502016f.pdf [file b502016f.pdf]

Figure S1. Single and multiple scattering paths with effective path lengths less than 4.8 Å and intensities at least 2.5% of the path of maximum scattering intensity for the  $\text{UO}_2^{2+}$ -HDEHP complex with  $\theta_p = 155^\circ$ .

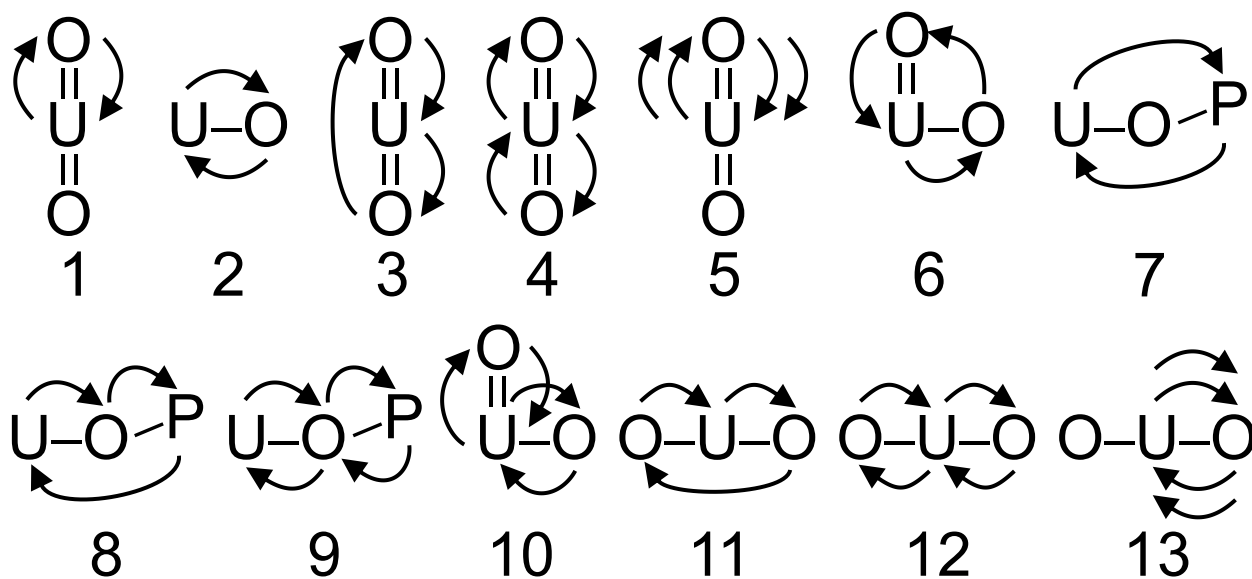

Figure S2. Contribution of each individual FEFF8.00 scattering path to the total fit of the  $\text{UO}_2^{2+}$ -HDEHP experimental EXAFS for  $\theta_p = 155^\circ$ . Distances are not phase shift corrected.

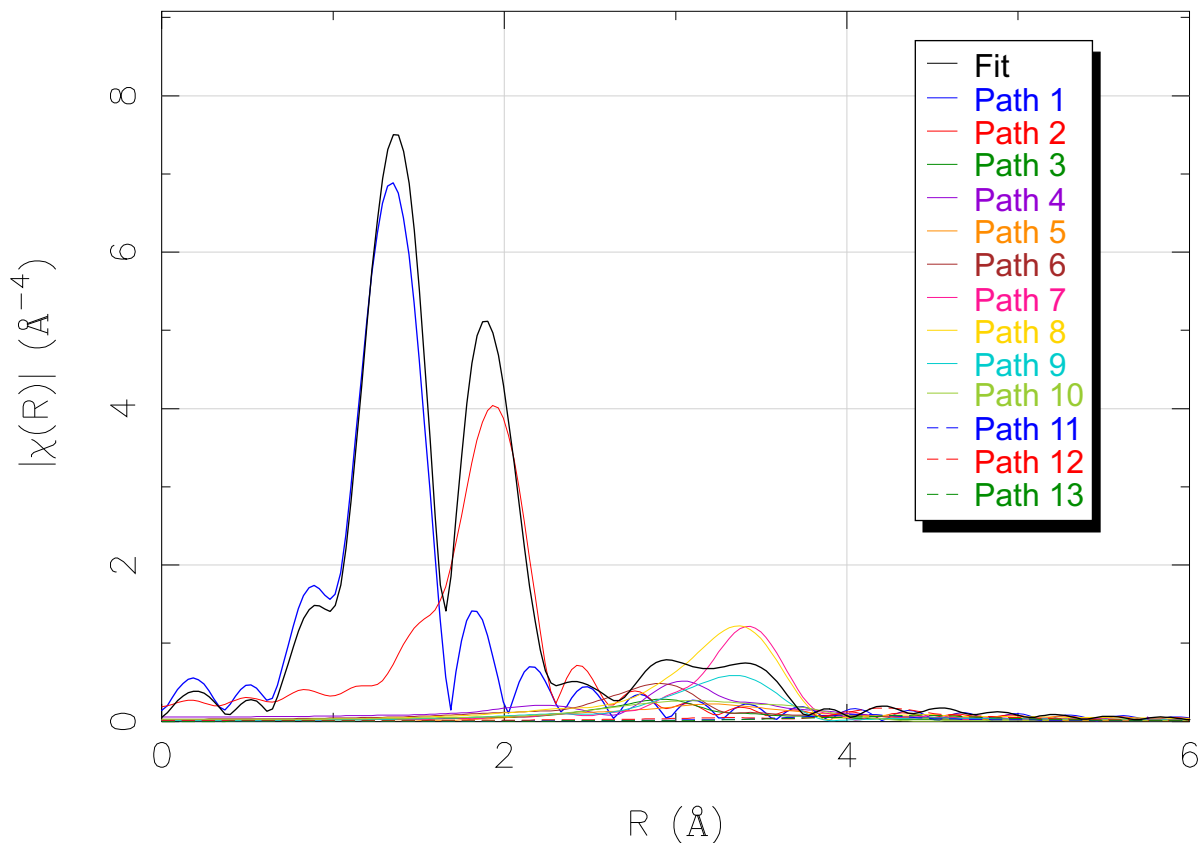

Figure S3. Single and multiple scattering paths with effective path lengths less than 4.8 Å and intensities at least 2.5% of the path of maximum scattering intensity for the Eu-HDEHP complex with  $\theta_p = 150^\circ$ .

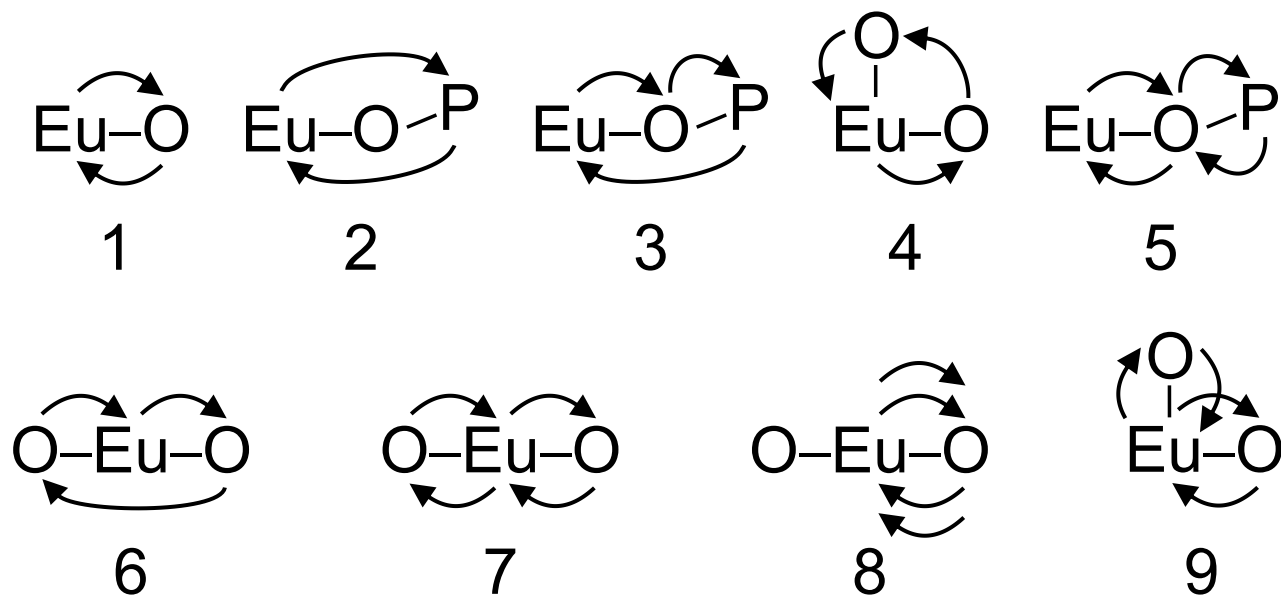

Figure S4. Contribution of each individual FEFF8.00 scattering path to the total fit of the Eu-HDEHP experimental EXAFS for  $\theta_p = 150^\circ$ . Distances are not phase shift corrected.

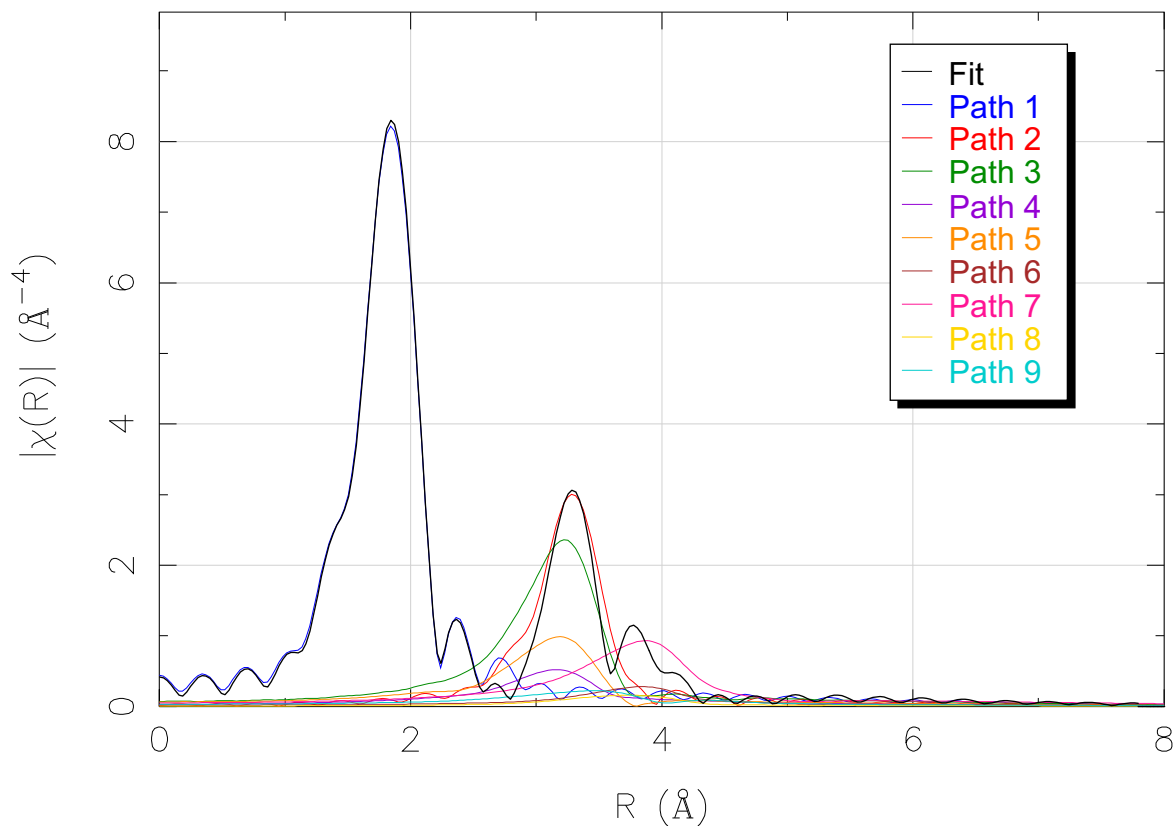

Table S1. Model for fitting the  $\text{UO}_2^{2+}$ -HDEHP EXAFS to the FEFF8.00 calculated paths.  $N_O$  = number of coordinated HDEHP oxygens,  $R_{yl}$  = axial “-yl” U=O oxygen distance,  $R_{eq}$  = U-O distance for coordinated HDEHP oxygens,  $R_P$  = U-P distance,  $\theta_P = \angle\text{U-O-P}$ ,  $R_{O-P}$  = O-P distance for the HDEHP oxygen and phosphorous =  $(2R_{eq} \cos(\theta_P) \pm [\{2R_{eq} \cos(\theta_P)\}^2 - 4\{R_{eq}^2 - R_P^2\}]^{0.5}) / 2$ ,  $\sigma_{yl}^2$  = Debye-Waller factor for axial -yl oxygens,  $\sigma_{eq}^2$  = Debye-Waller factor for coordinated HDEHP oxygens,  $\sigma_P^2$  = Debye-Waller factor for phosphorous. Parameters varied in the fit are shown in red. The other parameters were either calculated from the varied parameters, or fixed at the given numeric values.

| Path | Coordination Number, $N$ | Effective Path Length, $R$                            | Debye-Waller Factor, $\sigma^2$ |
|------|--------------------------|-------------------------------------------------------|---------------------------------|
| 1    | 2                        | $R_{yl}$                                              | $\sigma_{yl}^2$                 |
| 2    | $N_O$                    | $R_{eq}$                                              | $\sigma_{eq}^2$                 |
| 3    | 2                        | $2R_{yl}$                                             | $2\sigma_{yl}^2$                |
| 4    | 2                        | $2R_{yl}$                                             | $2\sigma_{yl}^2$                |
| 5    | 4                        | $2R_{yl}$                                             | $4\sigma_{yl}^2$                |
| 6    | $4N_O$                   | $([R_{yl}^2 + R_{eq}^2]^{0.5} + R_{yl} + R_{eq}) / 2$ | $\sigma_{yl}^2 + \sigma_{eq}^2$ |
| 7    | $N_O$                    | $R_P$                                                 | $\sigma_P^2$                    |
| 8    | $2N_O$                   | $(R_{eq} + R_P + R_{O-P}) / 2$                        | $\sigma_{eq}^2 + \sigma_P^2$    |
| 9    | $N_O$                    | $R_{eq} + R_{O-P}$                                    | $\sigma_{eq}^2 + \sigma_P^2$    |
| 10   | $4N_O$                   | $R_{yl} + R_{eq}$                                     | $\sigma_{yl}^2 + \sigma_{eq}^2$ |
| 11   | $N_O$                    | $2R_{eq}$                                             | $2\sigma_{eq}^2$                |
| 12   | $N_O$                    | $2R_{eq}$                                             | $2\sigma_{eq}^2$                |
| 13   | $N_O$                    | $2R_{eq}$                                             | $4\sigma_{eq}^2$                |

Table S2. Model for fitting the  $\text{Eu}^{3+}$ -HDEHP EXAFS to the FEFF8.00 calculated paths.  $N_O$  = number of coordinated oxygens,  $R_O$  = Eu-O distance,  $R_P$  = Eu-P distance,  $\theta_P = \angle\text{Eu-O-P}$ ,  $R_{O-P}$  = O-P distance =  $(2R_O \cos(\theta_P) \pm [\{2R_O \cos(\theta_P)\}^2 - 4\{R_O^2 - R_P^2\}]^{0.5}) / 2$ ,  $\sigma_O^2$  = Debye-Waller factor for coordinated oxygen,  $\sigma_P^2$  = Debye-Waller factor for phosphorous. Parameters varied in the fit are shown in red. The other parameters were calculated from the varied parameters.

| Path | Coordination Number, $N$ | Effective Path Length, $R$  | Debye-Waller Factor, $\sigma^2$ |
|------|--------------------------|-----------------------------|---------------------------------|
| 1    | $N_O$                    | $R_O$                       | $\sigma_O^2$                    |
| 2    | $N_O$                    | $R_P$                       | $\sigma_P^2$                    |
| 3    | $2N_O$                   | $(R_O + R_P + R_{O-P}) / 2$ | $\sigma_O^2 + \sigma_P^2$       |
| 4    | $4N_O$                   | $(2 + \sqrt{2})R_O / 2$     | $2\sigma_O^2$                   |
| 5    | $N_O$                    | $R_O + R_{O-P}$             | $\sigma_O^2 + \sigma_P^2$       |
| 6    | $N_O$                    | $2R_O$                      | $2\sigma_O^2$                   |
| 7    | $N_O$                    | $2R_O$                      | $2\sigma_O^2$                   |
| 8    | $N_O$                    | $2R_O$                      | $2\sigma_O^2$                   |
| 9    | $4N_O$                   | $2R_O$                      | $2\sigma_O^2$                   |
